# Supplementary material for: Effectiveness of High-Intensity Laser Therapy Plus Ultrasound-Guided Peritendinous Hyaluronic Acid Compared to Therapeutic Exercise for Patients with Lateral Elbow Tendinopathy
Source: MDPI journal article supplement (doi:10.3390/jcm11195492), 2022-09-20

Supplementary Table S1: Linear Mixed Model, variation of hand-grip Peak strength during the follow-up according to treatment.

|                |                   |                                  | Model A          | Model B       | Model C        |
|----------------|-------------------|----------------------------------|------------------|---------------|----------------|
| Initial status | Intercept         | $\gamma_{00}$                    | 112.77±1.36 ***  | 93.28±1.16*** | 94.11±1.92***  |
|                | Treatment         | $\gamma_{01}$                    |                  |               | -2.45±2.42     |
| Rate of change | Intercept (tempo) | $\gamma_{10B}$                   |                  | Reference     | Reference      |
|                |                   | $\gamma_{10T1}$                  |                  | 23.28±1.02*** | 17.36±1.39***  |
|                |                   | $\gamma_{10T2}$                  |                  | 25.53±1.28*** | 18.88±1.92***  |
|                |                   | $\gamma_{10T3}$                  |                  | 30.26±1.63*** | 25.53±2.58***  |
|                |                   | $\gamma_{11 \text{ BHyA+HILT}}$  |                  |               | Reference      |
|                |                   | $\gamma_{11 \text{ T1HyA+HILT}}$ |                  |               | 11.21±1.89***  |
|                |                   | $\gamma_{11 \text{ T2HyA+HILT}}$ |                  |               | 12.06±2.94***  |
|                |                   | $\gamma_{11 \text{ T3HyA+HILT}}$ |                  |               | 7.57±3.26*     |
| Level 1        | Within person     | $\delta^2_e$                     | 210.81±18.49 *** | 33.12±3.35*** | 26.94±2.73***  |
| Level 2        | In initial status | $\delta^2_0$                     | 68.09±20.70 ***  | 51.27±18.10** | 61.79±18.59*** |
|                | In rate of change | $\delta^2_1$                     |                  | 11.88±3.14*** | 11.76±2.99***  |
|                | Covariance        | $\delta_{01}$                    |                  | -4.08±5.78    | -6.62±5.76     |
|                |                   | $\rho$                           | 24.5             | 60.7          | 69.7           |
|                |                   | $R^2_e$                          |                  | 84.3          | 87.1           |
|                |                   | AIC                              | 2675.7           | 2290.1        | 2181.0         |

\*, < 0.05 – 0.01, \*\*, 0.009 – 0.001, \*\*\* < 0.001

Supplementary Table S2: Linear Mixed Model, variation of hand-grip mean-strength during the follow-up according to treatment.

|                |                   |                                  | Model A         | Model B       | Model C        |
|----------------|-------------------|----------------------------------|-----------------|---------------|----------------|
| Initial status | Intercept         | $\gamma_{00}$                    | 102.58±1.44 *** | 78.37±1.16*** | 77.59±1.37***  |
|                | Treatment         | $\gamma_{01}$                    |                 |               | -0.09±2.16     |
| Rate of change | Intercept         | $\gamma_{10B}$                   |                 | Reference     | Reference      |
|                |                   | $\gamma_{10T1}$                  |                 | 40.24±1.78*** | 18.33±1.61 *** |
|                |                   | $\gamma_{10T2}$                  |                 | 31.72±1.47*** | 23.70±2.15***  |
|                |                   | $\gamma_{10T3}$                  |                 | 30.26±1.63*** | 35.83±2.83***  |
|                |                   | $\gamma_{11 \text{ BHyA+HILT}}$  |                 |               | Reference      |
|                |                   | $\gamma_{11 \text{ T1HyA+HILT}}$ |                 |               | 17.24±2.20***  |
|                |                   | $\gamma_{11 \text{ T2HyA+HILT}}$ |                 |               | 14.49±2.81***  |
|                |                   | $\gamma_{11 \text{ T3HyA+HILT}}$ |                 |               | 6.49±3.60      |
| Level 1        | Within person     | $\delta^2_e$                     | 335.10±29.21*** | 54.67±5.42*** | 38.26±3.86***  |
| Level 2        | In initial status | $\delta^2_0$                     | 57.30±22.79***  | 19.90±16.03   | 31.90±15.20*   |
|                | In rate of        | $\delta^2_1$                     |                 | 11.69±3.65*** | 13.56±3.62***  |
|                | Covariance        | $\delta_{01}$                    |                 | 3.42±5.72     | -4.45±5.74     |
|                |                   | $\rho$                           | 14.5            | 27.0          | 45.7           |
|                |                   | $R^2_e$                          |                 | 83.8          | 88.7           |
|                |                   | AIC                              | 2803.3          | 2338.5        | 2238.4         |

\*, < 0.05 – 0.01, \*\*, 0.009 – 0.001, \*\*\* < 0.001

Supplementary Table S3: Linear Mixed Model, follow-up variation of PRTEE-score according to treatments.

|                |                   |                                  | Model A       | Model B        | Model C        |
|----------------|-------------------|----------------------------------|---------------|----------------|----------------|
| Initial status | Intercept         | $\gamma_{00}$                    | 18.86±0.95*** | 63.55±0.66***  | 65.20±1.97***  |
|                | Treatment         | $\gamma_{01}$                    |               |                | -0.98±1.31     |
| Rate of change | Intercept         | $\gamma_{10B}$                   |               | Reference      | Reference      |
|                |                   | $\gamma_{10T1}$                  |               | -36.73±0.87*** | -48.86±2.59*** |
|                |                   | $\gamma_{10T2}$                  |               | -46.36±1.56*** | -55.58±3.46*** |
|                |                   | $\gamma_{10T3}$                  |               | -51.25±1.51*** | -57.43±4.56*** |
|                |                   | $\gamma_{11 \text{ BHyA+HILT}}$  |               |                | Reference      |
|                |                   | $\gamma_{11 \text{ T1HyA+HILT}}$ |               |                | 8.25±1.69***   |
|                |                   | $\gamma_{11 \text{ T2HyA+HILT}}$ |               |                | 6.46±2.34**    |
|                |                   | $\gamma_{11 \text{ T3HyA+HILT}}$ |               |                | 4.60±3.14      |
| Level 1        | Within person     | $\delta^2_e$                     | 83.93±8.77*** | 22.75±2.30***  | 19.84±2.04***  |
| Level 2        | In initial status | $\delta^2_0$                     | 31.93±9.93*** | 20.59±9.35*    | 24.93±9.59**   |
|                | In rate of        | $\delta^2_1$                     |               | 11.27±2.77***  | 11.71±2.79***  |
|                | Covariance        | $\delta_{01}$                    |               | -11.65±4.50*   | -13.63±4.63**  |
|                |                   | $\rho$                           | 27.6          | 50.0           | 56.8           |
|                |                   | $R^2_e$                          |               | 72.6           | 76.2           |
|                |                   | AIC                              | 2803.3        | 2070.8         | 2033.1         |

\*, < 0.05 – 0.01, \*\*, 0.009 – 0.001, \*\*\* < 0.001

Supplementary Figure S1: Ultra-sound image of the lateral elbow, longitudinal view. 1) humerus, 2) epicondyle, 3) head of radius, 4) extensor tendons, 5) calcific lesion of the tendons.

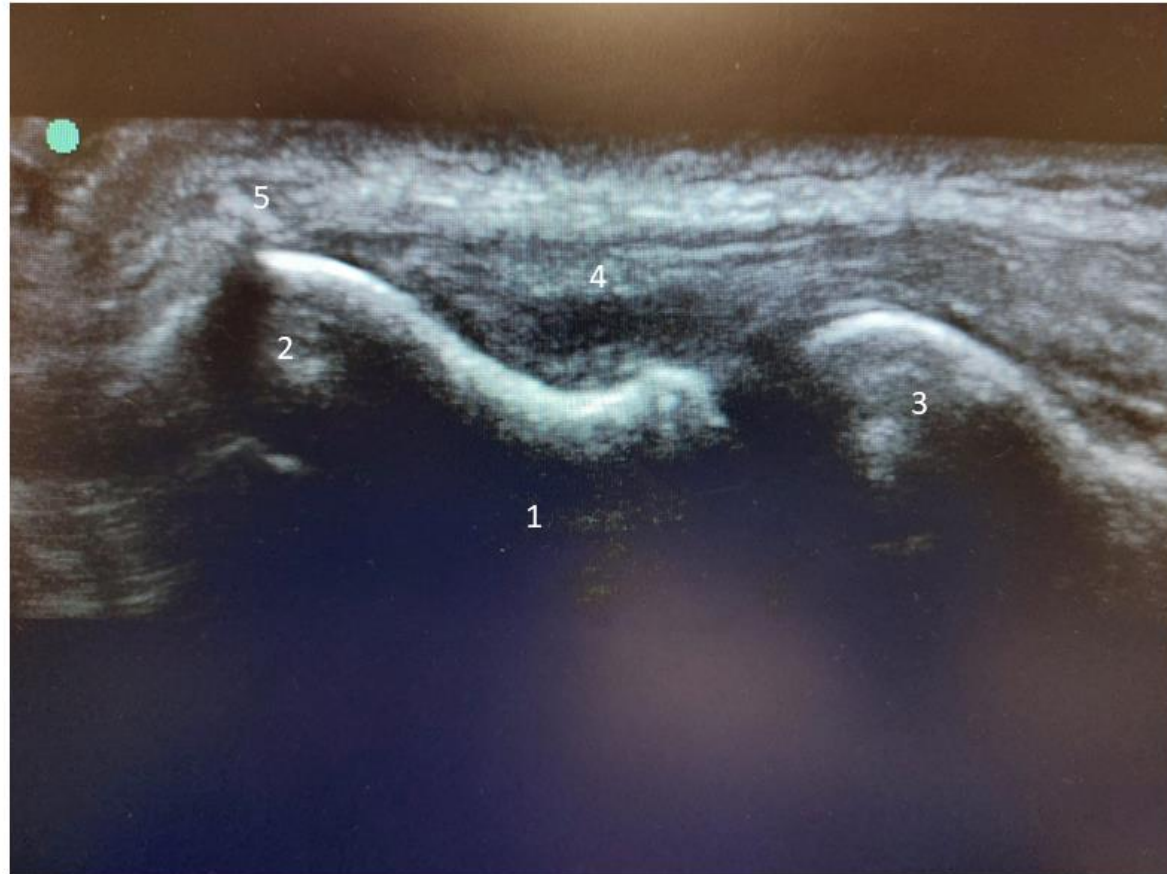

Supplementary Figure S2: Ultra-sound-guided (6-15 Mhz linear probe) Hyaluronic Acid injections in the peritendinous area of the elbow epicondyle. The injections were done using a pre-filled syringe of 20 mg in 2 ml of linear Hy-A sodium salt with a molecular weight of 500-730 kDa.

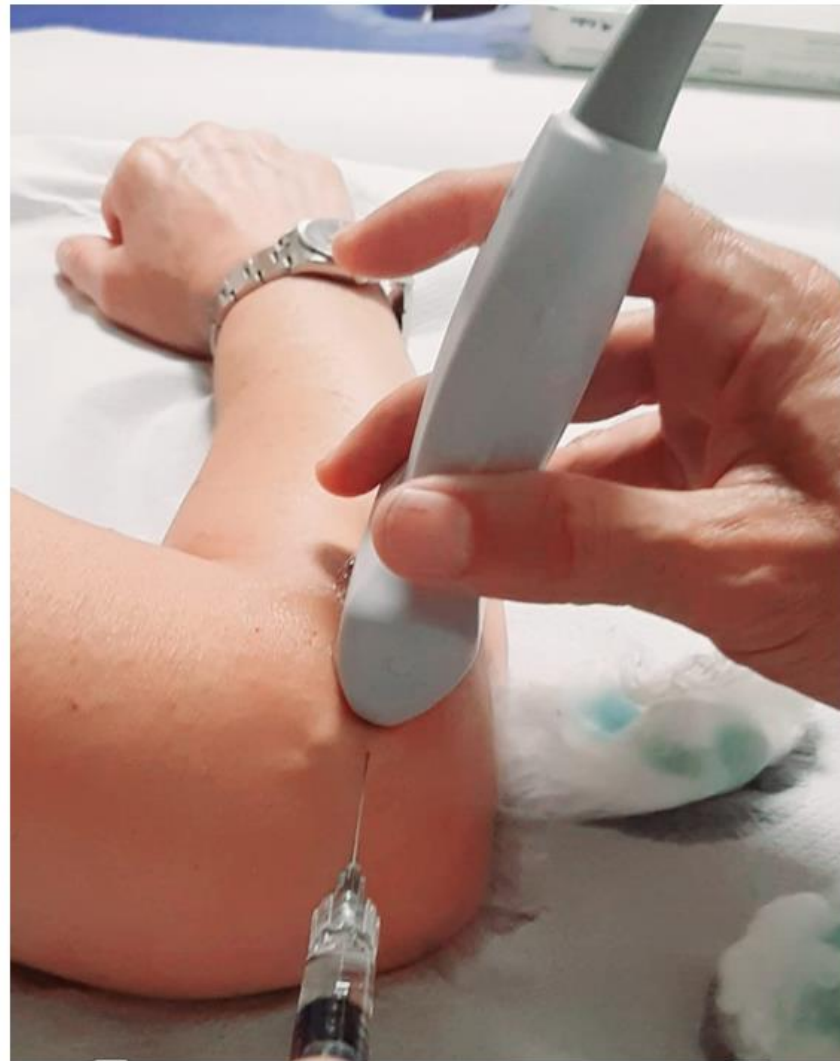

Supplement: s1 [file s1]
